# Supplementary material for: Baseline Prediction of Combination Therapy Outcome in Hepatitis C Virus 1b Infected Patients by Discriminant Analysis Using Viral and Host Factors
Source: PubMed Central journal article supplement (PMC2994723; doi:10.1371/journal.pone.0014132), 2010-11-30
Supplement: pone.0014132.s001.pdf [file pone.0014132.s001.pdf]

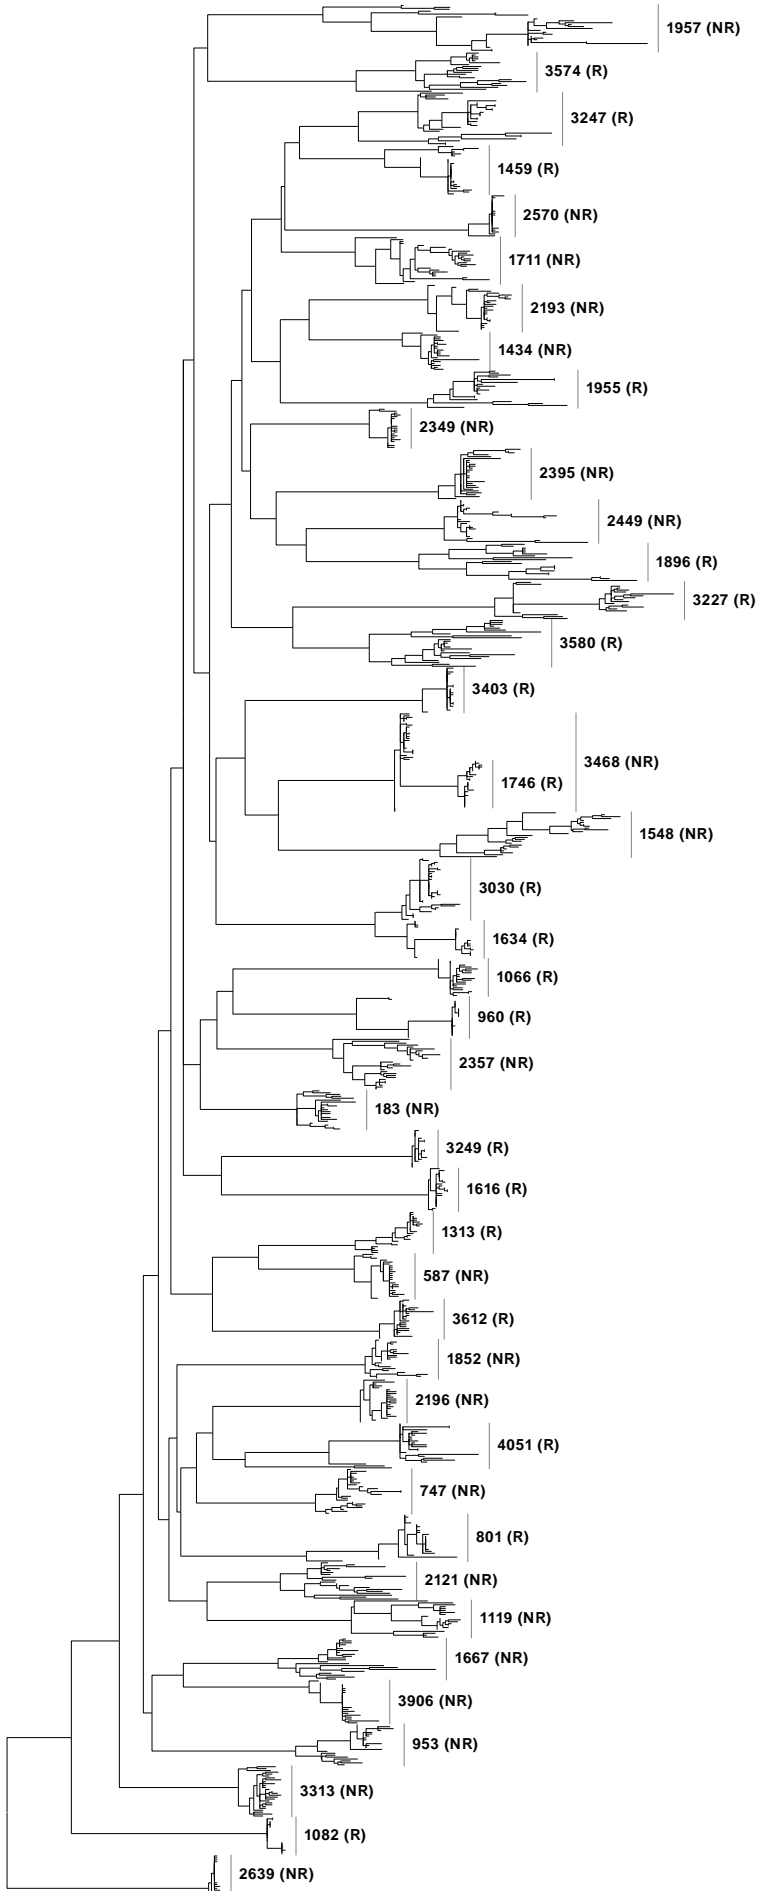

1957 (NR)

3574 (R)

3247 (R)

1459 (R)

2570 (NR)

1711 (NR)

2193 (NR)

1434 (NR)

1955 (R)

2349 (NR)

2395 (NR)

2449 (NR)

1896 (R)

3227 (R)

3580 (R)

3403 (R)

1746 (R)

3468 (NR)

1548 (NR)

3030 (R)

1634 (R)

1066 (R)

960 (R)

2357 (NR)

183 (NR)

3249 (R)

1616 (R)

1313 (R)

587 (NR)

3612 (R)

1852 (NR)

2196 (NR)

4051 (R)

747 (NR)

801 (R)

2121 (NR)

1119 (NR)

1667 (NR)

3906 (NR)

953 (NR)

3313 (NR)

1082 (R)

2639 (NR)

0.05
